# Supplementary material for: Influence of ionic liquids on the chain dynamics and enthalpy relaxation of poly(methyl methacrylate)
Source: Royal Society of Chemistry journal article supplement (doi:10.1039/d2cp02223k), 2022-01-01
Supplement: d2cp02223k1.pdf [file d2cp02223k1.pdf]

# **Influence of Ionic Liquids on the Chain Dynamics and Enthalpy Relaxation of Poly(methyl methacrylate)**

Gang Liu, Dong Fang, Yongjie Dan, Huan Luo, Cong Luo, Yanhua Niu\*, Guangxian

Li\*

*College of Polymer Science and Engineering, State Key Laboratory of Polymer  
Materials Engineering of China, Sichuan University, Chengdu 610065, China*

\*Corresponding author. Tel: 86-28-85401841; Fax: 86-28-85401841.

E-mail: [yhniu@scu.edu.cn](mailto:yhniu@scu.edu.cn); [guangxianli@scu.edu.cn](mailto:guangxianli@scu.edu.cn)

Submitted to *Physical Chemistry Chemical Physics* to the editor

## SUPPORTING

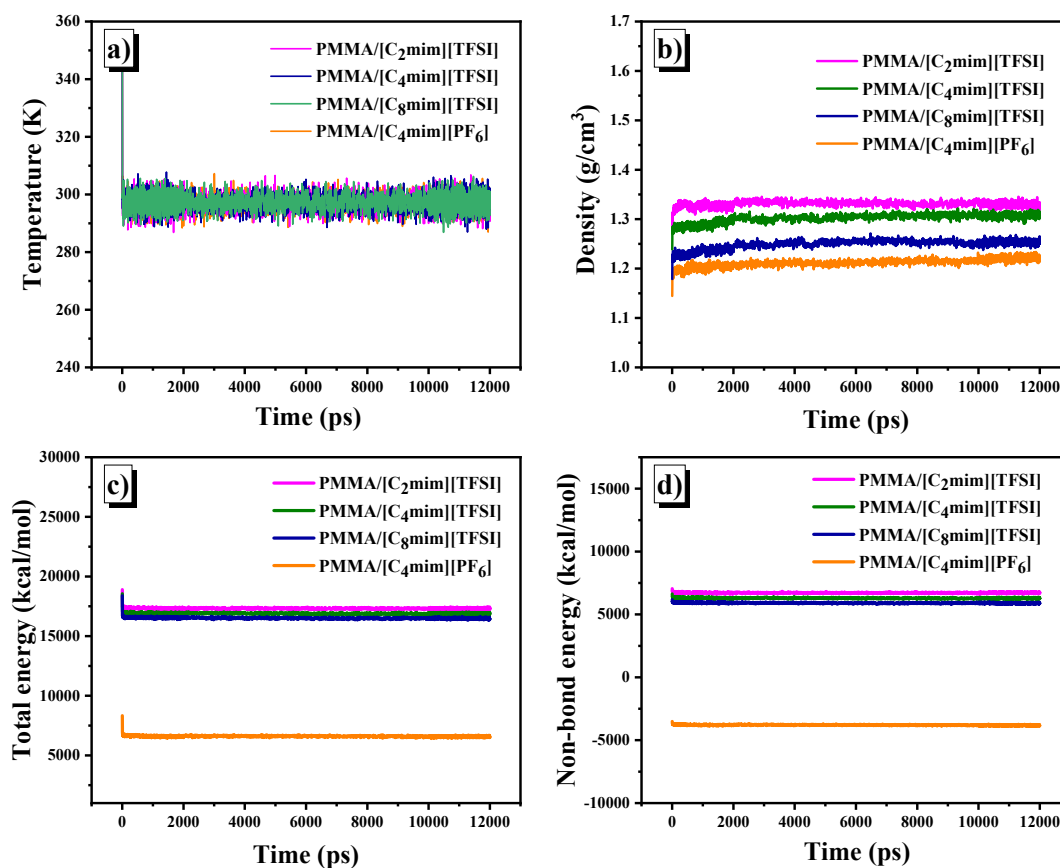

**Figure. S1** The related parameters in molecular dynamic simulations (NPT ensembles) for PMMA/ILs blends (at the weight ratio of 50:50): temperature a), density b), total energy c) and non-bond energy d).

**Table. S1** Comparison of density between reference and our simulation result. Where physicochemical properties of ILs was referred to Watanabe's work (H. Tokuda, S. Tsuzuki, M. A. B. H. Susan, K. Hayamizu and M. Watanabe, *J. Phys. Chem. B*, 2006, **110**, 19593-19600).

| ILs                                    | $\rho$ (g/cm <sup>3</sup> )<br>at 25 °C <sup>a</sup> | $\rho$ (g/cm <sup>3</sup> )<br>at 298 K <sup>b</sup><br>(our NPT) | Std. Dev. |
|----------------------------------------|------------------------------------------------------|-------------------------------------------------------------------|-----------|
| [C <sub>2</sub> mim][TFSI]             | 1.519                                                | 1.64                                                              | 8.0%      |
| [C <sub>4</sub> mim][TFSI]             | 1.437                                                | 1.55                                                              | 7.9%      |
| [C <sub>8</sub> mim][TFSI]             | 1.320                                                | 1.40                                                              | 6.1%      |
| [C <sub>4</sub> mim][PF <sub>6</sub> ] | 1.368                                                | 1.41                                                              | 3.1%      |

**Table. S2** Related parameters in molecular dynamic simulations for cohesive energy density (CED) and  $\chi$  calculation.

| Force field:<br>COMPASS II                 | [C <sub>2</sub> mim][TFSI]<br>+PMMA | [C <sub>4</sub> mim][TFSI]<br>+PMMA | [C <sub>8</sub> mim][TFSI]<br>+PMMA | [C <sub>4</sub> mim][PF <sub>6</sub> ]<br>+PMMA |
|--------------------------------------------|-------------------------------------|-------------------------------------|-------------------------------------|-------------------------------------------------|
| CED <sub>blends</sub> (J/cm <sup>3</sup> ) | 1064.7                              | 1005.6                              | 891.6                               | 1253.0                                          |
| CED <sub>IL</sub> (J/cm <sup>3</sup> )     | 2179.9                              | 1972.4                              | 1613.8                              | 2496.6                                          |
| CED <sub>PMMA</sub> (J/cm <sup>3</sup> )   | 246.1                               | 246.1                               | 246.1                               | 246.1                                           |
| $\varphi_{IL}$                             | 0.422352                            | 0.432998                            | 0.462893                            | 0.449071                                        |
| $\varphi_{PMMA}$                           | 0.577648                            | 0.567002                            | 0.537107                            | 0.550929                                        |
| $\varphi^*CED(IL)$                         | 920.6851                            | 854.0444                            | 747.0172                            | 1121.152                                        |
| $\varphi^*CED(PMMA)$                       | 142.1592                            | 139.5393                            | 132.182                             | 135.5835                                        |
| $\Delta E_{mix}$ (J/cm <sup>3</sup> )      | -1.85574                            | -12.0163                            | -12.4008                            | 3.735397                                        |
| $V_m$ (cm <sup>3</sup> /mol)               | 257                                 | 292                                 | 360                                 | 207.6                                           |
| $\chi$                                     | -0.1925                             | -1.4162                             | -1.80188                            | 0.312995                                        |

**Table. S3** PALS related parameters.

| PMMA/ILs<br>70/30 wt%                  | $I_1$ (%) <sup>d</sup> | $I_2$ (%) <sup>d</sup> | $I_3$ (%) <sup>d</sup> | $T_g$ (°C) |
|----------------------------------------|------------------------|------------------------|------------------------|------------|
| [C <sub>2</sub> mim][TFSI]             | 48.93                  | 42.93                  | 8.139                  | 61.7       |
| [C <sub>4</sub> mim][TFSI]             | 50.25                  | 41.49                  | 8.263                  | 59.6       |
| [C <sub>8</sub> mim][TFSI]             | 50.25                  | 40.54                  | 9.208                  | 54.2       |
| [C <sub>4</sub> mim][PF <sub>6</sub> ] | 51.02                  | 40.56                  | 8.425                  | 61.8       |

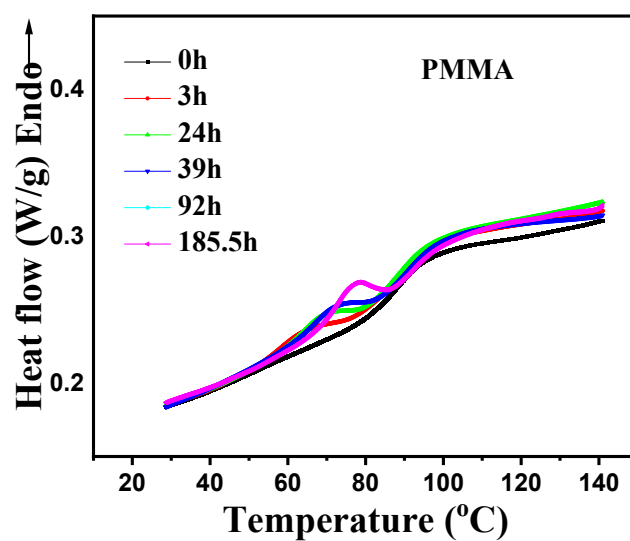

**Figure. S2** DSC heating scan curves for PMMA aged at 50 °C for different time.
